# Supplementary material
Source: MDPI journal article supplement (https://www.mdpi.com/2073-4395/11/9/1690)
Supplement: s1 [file s1 › agronomy-1318331-supplementary.pdf]

Table S1. Air temperature and rainfall in May, June and July of 2017, 2018 and 2019 in two experimental locations

| Month | Poznań        |          | Radzików      |          |
|-------|---------------|----------|---------------|----------|
|       | Rainfall (mm) | Temp. °C | Rainfall (mm) | Temp. °C |
| 2017  |               |          |               |          |
| May   | 52.8          | 13.6     | 57.0          | 14.6     |
| June  | 53.4          | 17.4     | 126.6         | 18.4     |
| July  | 168.0         | 17.8     | 70.0          | 18.9     |
| 2018  |               |          |               |          |
| May   | 16.6          | 17.9     | 73.2          | 17.9     |
| June  | 22.8          | 19.4     | 25.2          | 19.3     |
| July  | 81.3          | 20.8     | 80.0          | 22.1     |
| 2019  |               |          |               |          |
| May   | 95.0          | 16.0     | 9.2           | 16.7     |
| June  | 3.6           | 23.0     | 40.8          | 22.8     |
| July  | 43.0          | 19.0     | 53.2          | 19.1     |
